# Supplementary material for: The Rootstock Genotypes Determine Drought Tolerance by Regulating Aquaporin Expression at the Transcript Level and Phytohormone Balance
Source: MDPI journal article supplement (doi:10.3390/plants12040718), 2023-02-06
Supplement: s1 [file s1]

## The rootstock genotypes determine drought tolerance by regulating aquaporin expression and phytohormone balance

David Labarga, Andreu Mairata, Miguel Puelles, Ignacio Martín, Alfonso Albacete, Enrique García-Escudero and Alicia Pou

### SUPPLEMENTARY MATERIAL:

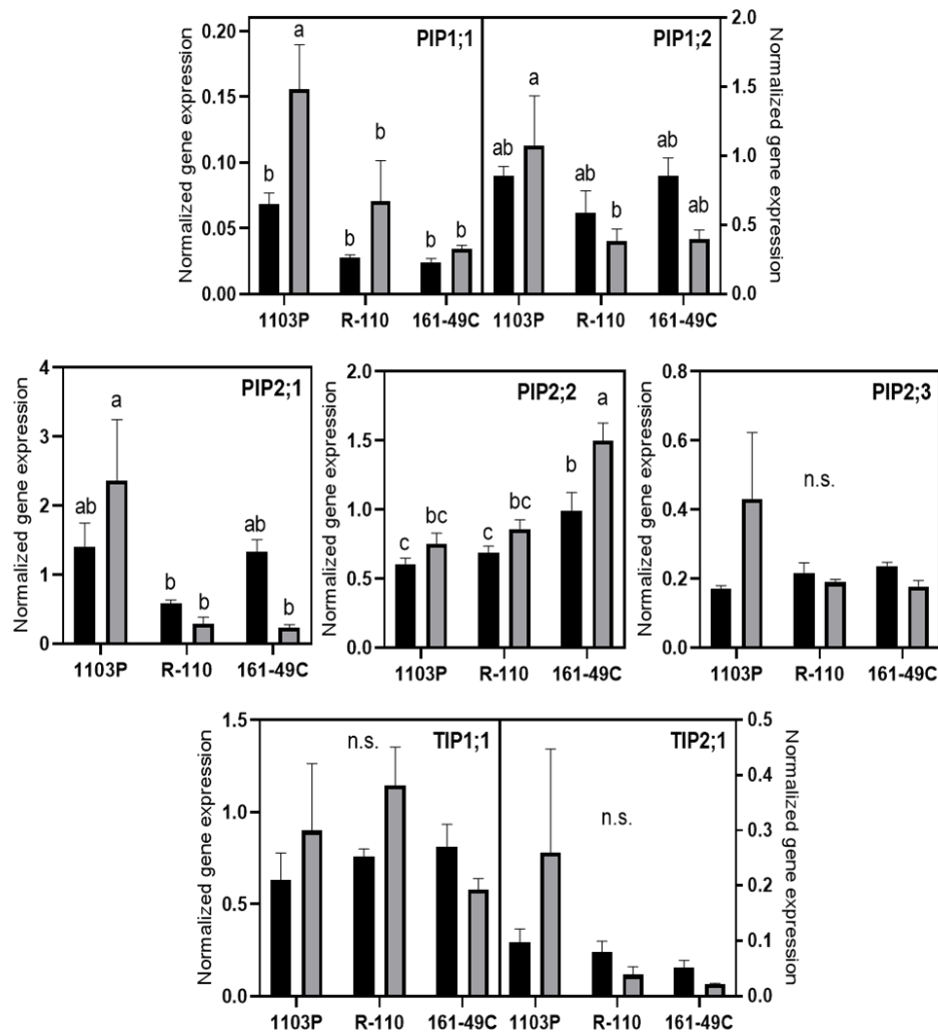

**Figure S1:**  $2^{-\Delta\Delta Ct}$  of studied aquaporin genes for each rootstock under well water (WW) (black) and water stress (WS) (grey). Different letters indicate statistically significant differences by one-way ANOVA with Duncan's multiple comparison test ( $p < 0.05$ ) for each aquaporin gen studied.

**Table S1.** Mean values of several vegetative growth components of the different rootstocks: clusters, pruning weight, spurs per vine, shoots per vine, 100 berries weight, total clusters weight and cluster weight.

|              |            | Clusters     | Pruning weight<br>(kg ha <sup>-1</sup> ) | Spur (spur<br>vine <sup>-1</sup> ) | Shoots (shoots<br>vine <sup>-1</sup> ) | 100 berries<br>weight (g) | Total clusters<br>weight (kg<br>vine <sup>-1</sup> ) | Cluster<br>weight (g<br>cluster <sup>-1</sup> ) |
|--------------|------------|--------------|------------------------------------------|------------------------------------|----------------------------------------|---------------------------|------------------------------------------------------|-------------------------------------------------|
| 1103P        | Irrigation | 17.40 ± 7.02 | 2592                                     | 5,80 ± 0,84                        | 13.00 ± 1.73                           | 220.30                    | 3.65                                                 | 209.57                                          |
|              | Drought    | 15.67 ± 5.24 | 1173                                     | 7.00 ± 1.58                        | 14.20 ± 4.38                           | 185.90                    | 3.57                                                 | 227.66                                          |
| R-110        | Irrigation | 19.33 ± 1.51 | 2089                                     | 6.00 ± 0.71                        | 13.80 ± 2.17                           | 226.40                    | 3.70                                                 | 191.38                                          |
|              | Drought    | 16.83 ± 3.60 | 821                                      | 5.60 ± 1.14                        | 11.80 ± 1.79                           | 191.80                    | 2.65                                                 | 157.43                                          |
| 161-49C      | Irrigation | 16.50 ± 5.65 | 1790                                     | 6.40 ± 0.89                        | 14.00 ± 2.12                           | 239.70                    | 3.48                                                 | 211.11                                          |
|              | Drought    | 16.17 ± 5.15 | 562                                      | 5.80 ± 1.30                        | 12.60 ± 3.21                           | 161.30                    | 2.18                                                 | 135.05                                          |
| Significance | TR         | n.s.         | -                                        | n.s.                               | n.s.                                   | -                         | -                                                    | -                                               |
|              | RT         | n.s.         | -                                        | n.s.                               | n.s.                                   | -                         | -                                                    | -                                               |
|              | TR x RT    | n.s.         | -                                        | n.s.                               | n.s.                                   | -                         | -                                                    | -                                               |

Values are means ± standard error of six vines per treatment. Significant differences for treatment (TR), rootstock (RT) and TR × RT were analyzed by two-way ANOVA (ns, not significant; \*,  $p \leq 0.05$ ; \*\*,  $p \leq 0.01$ ; \*\*\*,  $p \leq 0.001$ ). The bar (-) indicates there were not enough replicates to perform statistical analysis.

**Table S2.** Primer sequences of each aquaporin gene studied as well as the reference where the sequences were obtained.

| <i>Vitis</i> gene | Primer   |                               | Reference             |
|-------------------|----------|-------------------------------|-----------------------|
| PIP 1.1           | Forward: | 5'-GAGTGGTGCTGGGCGTTGATC-3'   | Gambetta et al. [109] |
|                   | Reverse: | 5'-GTGGAATGCTACAGACATTAC-3'   |                       |
| PIP 1.2           | Forward: | 5'-CGCCATCGTCTACAACAAAG-3'    | Vandeleur et al. [38] |
|                   | Reverse: | 5'-CAGGCTCTGGTCTTGAATGG-3'    |                       |
| PIP 2.1           | Forward: | 5'-GGCATTCTGCGGGGACACAT-3'    | Dayer et al. [40]     |
|                   | Reverse: | 5'-CTTTGACGAGACCCACACCA-3'    |                       |
| PIP 2.2           | Forward: | 5'-AACTAAAAACCCACAACACCC-3'   | Gambetta et al. [109] |
|                   | Reverse: | 5'-CATCATCATAATCATCTCTGG-3'   |                       |
| PIP 2.3           | Forward: | 5'-GCCATTGCAGCATCTATCA-3'     | Pou et al. [30]       |
|                   | Reverse: | 5'-TCCTACAGGGCCACAAATTC-3'    |                       |
| TIP 1.1           | Forward: | 5'-GTTGTTGTCTCAACCCATTTC-3'   | Galmés et al. [72]    |
|                   | Reverse: | 5'-ATCACC AACCTCATTCATATGC-3' |                       |
| TIP 2.1           | Forward: | 5'-GGAGGAAGAGCAAGTTGTGC-3'    | Pou et al. [30]       |
|                   | Reverse: | 5'-GCACATCACCAACCTCATTC-3'    |                       |
| Ubiquitin         | Forward: | 5'-GTGCTGTCAACTGCAGGAAA-3'    | Pou et al. [30]       |
|                   | Reverse: | 5'-GTAGCCATGGCACATCCAAT-3'    |                       |
| ELF               | Forward: | 5'-CGGGCAAGAGATACCTCAAT-3'    | Dayer et al. [40]     |
|                   | Reverse: | 5'-AGAGCCTCTCCCTCAAAAGG-3'    |                       |
| Actin             | Forward: | 5'-GCCTCCGATTCTCTGCTCTC-3'    | Vandeleur et al. [76] |
|                   | Reverse: | 5'-TCACCATTCAGTTCATTGTAC-3'   |                       |
